# Supplementary material for: Quasi-unidirectional shrinkage of gels with well-oriented lipid bilayers upon uniaxial stretching
Source: Royal Society of Chemistry journal article supplement (doi:10.1039/c4sm02113d), 2014-12-02
Supplement: c4sm02113d1.pdf [file c4sm02113d1.pdf]

Supplementary Information for

## Quasi-Unidirectional Shrinkage of Gels with Well-Oriented Lipid Bilayers upon Uniaxial Stretching

Tasuku Nakajima, Corentin Durand, Xu Feng Li, Md. Anamul Haque,  
Takayuki Kurokawa and Jian Ping Gong

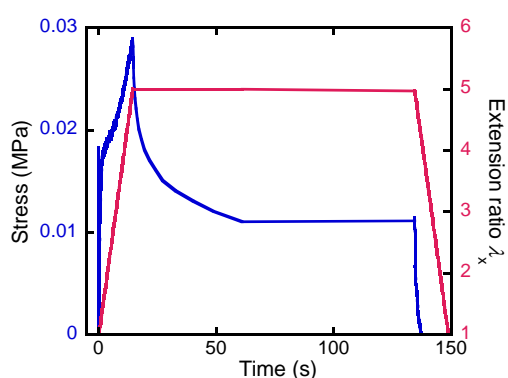

Figure S1: Stress-relaxation test results of the PDGI/PAAm gel at  $\lambda_x=5.0$ . The strain was applied at a stretching rate of  $0.27 \text{ s}^{-1}$ . Even at large  $\lambda_x$  of 5.0, which is larger than all of that used in our experiments, relaxation process of the gel was completed within 60 s. Since all the measurements in this paper have been done after at least 90 s waiting after deformation, this fact certifies that all the  $\lambda_y$  or  $\lambda_z$  results in this paper represent state of the gel in completely-relaxed state.

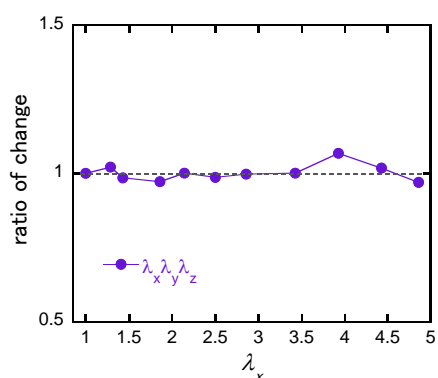

Figure S2:  $\lambda_x \lambda_y \lambda_z$  of the PDGI/PAAm gel dependence on  $\lambda_x$ , where  $\lambda_y$  and  $\lambda_z$  were determined by direct observation and from reflection spectra, respectively. Almost 1 of  $\lambda_x \lambda_y \lambda_z$  confirms accuracy of these measurements.
